# Supplementary material for: Towards a quantitative description of solid electrolyte conductance switches
Source: Royal Society of Chemistry journal article supplement (doi:10.1039/c0nr00298d), 2010-01-01
Supplement: c0nr00298d.pdf [file c0nr00298d.pdf]

## Supporting information

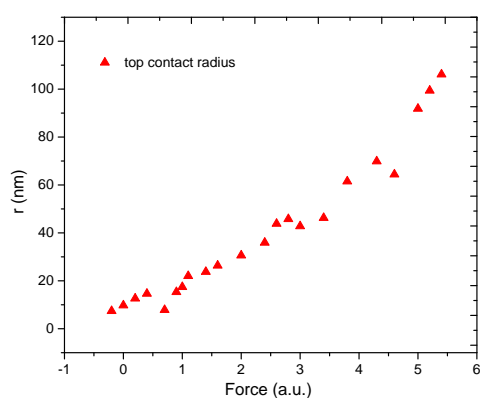

Figure 1: Contact radius calculated from a set of experimental I-V curves using Eq.(21), at different load AFM tip forces. Measurements start when tip is just in contact with the surface of the  $\text{Ag}_2\text{S}$  (smallest contact radius) followed by an increase of the tip-sample interaction.
